# Supplementary material for: Glabridin Ameliorates Alcohol-Caused Liver Damage by Reducing Oxidative Stress and Inflammation via p38 MAPK/Nrf2/NF-κB Pathway
Source: MDPI journal article supplement (doi:10.3390/nu15092157), 2023-04-30
Supplement: s1 [file s1]

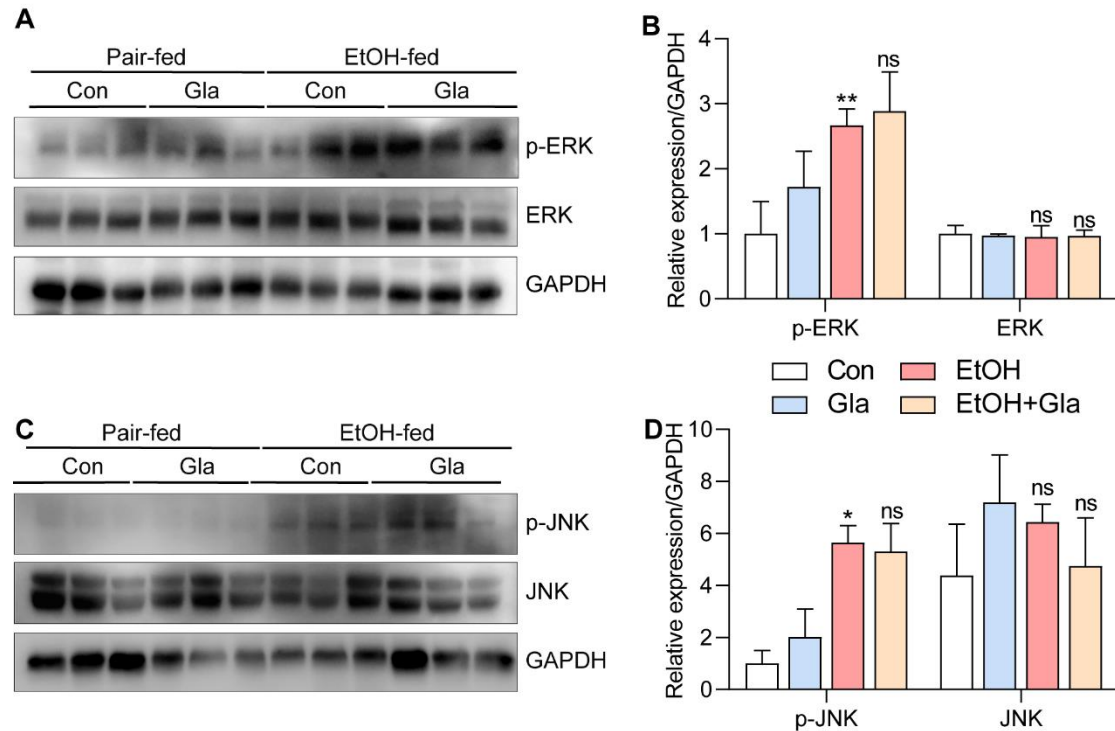

**Figure S1.** p-ERK/ERK and p-JNK/JNK levels in vitro. (A,B) Protein levels of p-ERK/ERK in the mouse liver were determined by Western blot (n = 3). (C,D) Protein levels of p-JNK/JNK in the mouse liver were determined by Western blot (n = 3). ns, not significant; \*  $p < 0.05$ , \*\*  $p < 0.01$  vs. "Con" group.

**Table S1.** Composition and contents of Lieber-DeCarli diet components (take for example the preparation of 1 L liquid diet).

| Ingredient                          | Calories Per Unit (kcal/g) | Weight (g) | Calories (kcal) |
|-------------------------------------|----------------------------|------------|-----------------|
| Lieber-DeCarli ethanol mice diet    |                            |            |                 |
| Caisein                             | 4                          | 41.4       | 166             |
| L-Cystine                           | 4                          | 0.5        | 2               |
| DL-Methionine                       | 4                          | 0.3        | 1               |
| Maltose Dextrin                     | 4                          | 25.6       | 102             |
| Cellulose                           | 0                          | 10         | 0               |
| Xanthan Gum                         | 0                          | 3          | 0               |
| Corn Oil                            | 9                          | 8.5        | 77              |
| Oliver Oil                          | 9                          | 28.4       | 256             |
| Safflower Oil                       | 9                          | 2.7        | 24              |
| Mineral Mix #210011                 | 0.47                       | 8.75       | 4               |
| Vitamin Mix #310011                 | 3.8                        | 2.5        | 9               |
| Choline Bitartrate                  | 0                          | 0.53       | 0               |
| 95% Ethanol                         | 5.35                       | 67 mL      | 358             |
| Lieber-DeCarli regular control diet |                            |            |                 |
| Caisein                             | 4                          | 41.4       | 166             |
| L-Cystine                           | 4                          | 0.5        | 2               |
| DL-Methionine                       | 4                          | 0.3        | 1               |
| Maltose Dextrin                     | 4                          | 115.2      | 461             |

|                      |      |      |     |
|----------------------|------|------|-----|
| Cellulose            | 0    | 10   | 0   |
| Xanthan Gum          | 0    | 3    | 0   |
| Corn Oil             | 9    | 8.5  | 77  |
| Oliver Oil           | 9    | 28.4 | 256 |
| Safflower Oil        | 9    | 2.7  | 24  |
| Mineral Mix #210011  | 0.47 | 8.75 | 4   |
| Vitamin Mix # 310011 | 3.8  | 2.5  | 9   |
| Choline Bitartrate   | 0    | 0.53 | 0   |
